# Supplementary material
Source: ML conference proceedings conference paper supplement (https://openaccess.thecvf.com/content/CVPR2026/html/Zhao_Extending_One-Step_Image_CVPR_2026_paper.html)
Supplement: Supplementary file 1 [file Zhao_Extending_One-Step_Image_CVPR_2026_supplemental.pdf]

# Extending One-Step Image Generation from Class Labels to Text via Discriminative Text Representation

## Supplementary Material

### 001 1. Velocity Field Learning Challenges: Class- 002 Label vs. Text Conditions

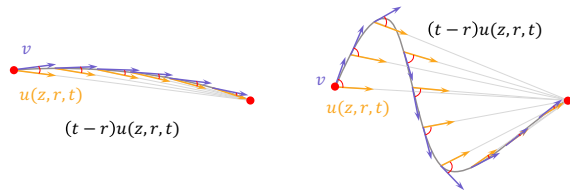

Figure 1. Denoising Trajectory Comparison. Simple class-label conditioning (left) yields a smooth path, whereas complex text conditioning (right) results in a tortuous path.

003 Extending MeanFlow from class-label conditioning to  
004 textual conditioning introduces fundamentally different chal-  
005 lenges for velocity field learning.

006 **Representation Separability.** Class labels are discrete and  
007 well-separated in the embedding space, enabling the velocity  
008 field to maintain a stable direction. Consequently, the de-  
009 noising trajectory is smooth, with the instantaneous velocity  
010 at each step closely aligning with the overall average velocity.  
011 This stability makes predicting the average velocity straight-  
012 forward, ensuring high fidelity even in few-step generation.  
013 In contrast, textual embeddings form dense and continuous  
014 distributions where semantically related prompts (e.g. blue  
015 teapot vs. red teapot) occupy neighboring regions, reduc-  
016 ing the *discriminability* of the representation. This density  
017 forces the velocity field to navigate fine-grained semantic  
018 distinctions, resulting in a more tortuous trajectory. The  
019 instantaneous velocity frequently diverges from the aver-  
020 age, leading to semantic drift and necessitating additional  
021 corrective iterations to converge on the target concept.

022 **Instruction Complexity.** Class labels typically encapsulate  
023 a single semantic concept, whereas natural language prompts  
024 often bind multiple attributes, objects, and spatial relations  
025 (e.g., a blue ceramic teapot on a wooden table next to a  
026 vase of red tulips). In few-step regimes, the model has  
027 limited opportunities for correction. Therefore, inadequate  
028 *disentanglement* of these semantic components can easily  
029 lead to binding errors, missing objects, or incorrect attribute  
030 assignments.

031 The generation dynamics differ significantly between  
032 class-label and textual conditioning, a contrast visualized  
033 in Fig. 1. Under the simpler class-label conditioning, the

denoising trajectory is relatively smooth. This smoothness  
indicates that the instantaneous velocity at each step closely  
aligns with the overall average velocity, making it straight-  
forward for the model to predict this average. This stability  
is rooted in the embedding space, where class-label features  
form sparse clusters with large inter-class margins, ensuring  
category integrity and attribute accuracy even in single-step  
generation.

In stark contrast, the higher complexity and coupled na-  
ture of textual conditions lead to a more tortuous denoising  
trajectory. This winding path causes a significant divergence  
between the instantaneous and average velocities, often man-  
ifesting as early-stage semantic drift. Consequently, the  
model struggles to converge on the correct average velocity,  
necessitating additional corrective steps. This difficulty is ex-  
acerbated by the nature of textual embeddings, which reside  
in densely packed neighborhoods and inherently complicate  
the estimation of a stable average velocity.

These observations directly link the challenges of text-  
conditioned MeanFlow to the key properties of high-quality  
textual representations introduced in the main text: strong  
*discriminability* and *disentanglement* are essential for pre-  
serving semantic fidelity when the velocity field is learned  
under limited denoising steps.

### 2. Additional Experiment on text encoder

We conducted analyses of the post-trained SANA-1.5 and  
OpenUni text encoders, and ran mean-flow experiments on  
OpenUni. We chose OpenUni because it shares the SANA-  
1.5 diffusion backbone, but uses a InternVL3-based text  
encoder. Tab. 2 compares the two encoders. After training,  
Gemma becomes less discriminative but more disentangled,  
which helps 20-step generation by refining the language  
space. In contrast, mean-flow few-step generation needs  
strong image-text discriminability, so it still fails even after  
encoder training. We also train mean flow on OpenUni under  
the same setup (Tab. 3). OpenUni performs better than SANA-  
1.5, benefiting from stronger text-encoder representations,  
but it still falls short of the original model due to insufficient  
discriminability.

### 3. Inference Time Comparison.

When generating images from the same prompt and timing  
diffusion sampling only, BLIP3o-NEXT on H200 takes 1.24  
s with 30 steps, while ours takes 0.22/0.12/0.08 s (4/2/1  
steps). For end-to-end generation with different prompts,

Table 1. Quantitative evaluation results on DPG-Bench. Our method consistently outperforms distilled few-step models of comparable scale under the same denoising step settings.

| Model                                                 | #Params | Steps | Global | Entity | Attribute | Relation | Other | Overall |
|-------------------------------------------------------|---------|-------|--------|--------|-----------|----------|-------|---------|
| <i>Pretrained Models</i>                              |         |       |        |        |           |          |       |         |
| PixArt- $\alpha$ [1]                                  | 0.6B    | 20    | 74.97  | 79.32  | 78.60     | 82.57    | 76.96 | 71.11   |
| Lumina-Next [2]                                       | 4B      | 20    | 82.82  | 88.65  | 86.44     | 80.53    | 81.82 | 74.63   |
| Playground v2.5 [3]                                   | /       | /     | 83.06  | 82.59  | 81.20     | 84.08    | 83.50 | 75.47   |
| Hunyuan-DiT [4]                                       | 1.5B    | 50    | 84.59  | 80.59  | 88.01     | 74.36    | 86.41 | 78.87   |
| PixArt- $\Sigma$ [5]                                  | 0.6B    | 20    | 86.89  | 82.89  | 88.94     | 86.59    | 87.68 | 80.54   |
| DALL-E 3 [6]                                          | /       | /     | 90.97  | 89.61  | 88.39     | 90.58    | 89.83 | 83.50   |
| FLUX.1 [Dev] [7]                                      | 12.7B   | 50    | 74.35  | 90.00  | 88.96     | 90.87    | 88.33 | 83.84   |
| SD3 Medium [8]                                        | 2B      | 50    | 87.90  | 91.01  | 88.83     | 80.70    | 88.68 | 84.08   |
| HiDream-II-Full [9]                                   | 3B      | 50    | 76.44  | 90.22  | 89.48     | 93.74    | 91.83 | 85.89   |
| Lumina-Image 2.0 [10]                                 | 2.6B    | 50    | -      | 91.97  | 90.20     | 94.85    | -     | 87.20   |
| Seedream 3.0 [11]                                     | /       | /     | 94.31  | 92.65  | 91.36     | 92.78    | 88.24 | 88.27   |
| GPT Image 1 [High] [12]                               | /       | /     | 88.89  | 88.94  | 89.84     | 92.63    | 90.96 | 85.15   |
| <i>Unified Models</i>                                 |         |       |        |        |           |          |       |         |
| MetaQuery-L [13]                                      | 3B      | 30    | -      | -      | -         | -        | -     | 81.10   |
| BLIP3-o-8B [14]                                       | 8B      | 30    | -      | -      | -         | -        | -     | 80.73   |
| OpenUni-B-512 [15]                                    | 1.6B    | 20    | 85.87  | 87.33  | 86.54     | 86.91    | 89.43 | 80.29   |
| Tar-7B [16]                                           | 9.6B    | 50    | -      | 88.62  | 88.05     | 93.98    | -     | 84.19   |
| TBAC-UniImage-3B [17]                                 | 4.6B    | 30    | 83.52  | 87.94  | 87.80     | 87.17    | 87.02 | 80.97   |
| Qwen-Image [18]                                       | 20B     | 50    | 91.32  | 91.56  | 92.02     | 94.31    | 92.73 | 88.32   |
| <i>Distilled Models</i>                               |         |       |        |        |           |          |       |         |
| SDXL-DMD2 [19]                                        | 2.6B    | 4     | 81.16  | 80.68  | 82.47     | 83.52    | 80.05 | 74.24   |
| SD3.5-L-Turbo [8]                                     | 8B      | 4     | 90.99  | 87.43  | 87.42     | 87.81    | 86.10 | 81.97   |
| SD3.5-Turbo [20]                                      | 8B      | 4     | 80.12  | 86.13  | 84.73     | 91.86    | 78.29 | 79.03   |
| FLUX.1-schnell [7]                                    | 12B     | 4     | 86.62  | 90.82  | 88.35     | 93.45    | 82.00 | 84.94   |
| SANA-Sprint [21]                                      | 1.6B    | 4     | 83.84  | 88.54  | 88.50     | 87.40    | 86.41 | 81.08   |
| <i>BLIP3o-NEXT and Ours under Few-Step Generation</i> |         |       |        |        |           |          |       |         |
| BLIP3o-NEXT                                           | 3B      | 1     | 73.60  | 69.10  | 73.48     | 79.92    | 69.09 | 57.05   |
|                                                       | 3B      | 2     | 82.32  | 79.35  | 79.16     | 77.71    | 79.66 | 67.38   |
|                                                       | 3B      | 4     | 88.53  | 85.99  | 85.04     | 87.78    | 86.44 | 78.15   |
|                                                       | 3B      | 30    | 86.21  | 88.55  | 86.82     | 90.14    | 88.01 | 82.05   |
| EMF                                                   | 3B      | 1     | 85.24  | 85.85  | 85.19     | 82.37    | 82.65 | 77.36   |
|                                                       | 3B      | 2     | 85.63  | 88.15  | 85.96     | 85.69    | 86.20 | 79.44   |
|                                                       | 3B      | 4     | 88.01  | 87.27  | 88.24     | 88.78    | 87.68 | 81.20   |
|                                                       | 3B      | 8     | 89.07  | 88.13  | 88.96     | 87.49    | 86.34 | 81.94   |

Table 2. Experiments on discriminability and disentanglement metrics for the trained SANA-1.5 and OpenUni text encoders.

| Metric              | Value |
|---------------------|-------|
| Disc. (Gemma-train) | 0.694 |
| Disc. (OpenUni)     | 0.724 |
| Dise. (Gemma-train) | 0.997 |
| Dise. (OpenUni)     | 0.996 |

078 BLIP3o-NEXT (30 steps) takes 11.3 s, whereas our 4-step  
079 version takes 9.87 s. The remaining time is mostly spent on  
080 autoregressive text-embedding generation.

Table 3. Results of OpenUni trained on Mean Flow.

| Steps | FM-GenEval | MF-GenEval |
|-------|------------|------------|
| 20    | 0.86       | 0.76       |
| 4     | 0.73       | 0.70       |
| 2     | 0.31       | 0.61       |
| 1     | 0.11       | 0.59       |

#### 4. User Study and ImageReward Result

Considering instruction-following ability, we conducted  
PickScore and a user study on 50 prompts (similar to Fig.1 in  
our manuscript). We recruited 20 users, who compared im-  
ages generated by five models for each prompt and answered:  
“Which result best matches the prompt?”

081

082

083

084

085

086

Table 4. Performance comparison across different models.

| Model          | PickScore   | User Study  |
|----------------|-------------|-------------|
| SDXL-DMD2      | 0.14        | 0.09        |
| SD3.5-L-Turbo  | 0.16        | 0.13        |
| FLUX.1-schnell | 0.17        | 0.12        |
| SANA-Sprint    | 0.25        | 0.16        |
| Ours           | <b>0.28</b> | <b>0.49</b> |

087 All models use 4-step generation, and both experiments  
088 show that our method performs better.

## 089 5. Additional Quantitative and Qualitative Re- 090 sults

091 We provide supplementary quantitative and qualitative eval-  
092 uations to further validate the effectiveness of our approach  
093 under limited denoising steps.

094 **DPG-Bench evaluation.** Generating high-fidelity images  
095 from complex and detail-rich textual prompts in a limited  
096 number of denoising iterations is a highly challenging task.  
097 To assess our model’s capability in this regime, we conduct  
098 extensive tests on DPG-Bench, which focuses on long-form  
099 prompts with intricate attribute bindings and spatial rela-  
100 tionships. As reported in Tab. 1, our method consistently  
101 outperforms equally sized distilled few-step models under  
102 the same step setting, despite the inherent difficulty of the  
103 benchmark. Notably, with only 8 sampling steps, our model  
104 delivers performance on par with the BLIP3o-NEXT base-  
105 line using 30 steps, and even under the challenging *1-step*  
106 regime, it surpasses widely-used distilled models such as  
107 SDXL-DMD2 and Playground v2.5 in overall score.

108 **Vertical comparison across sampling steps.** We ad-  
109 ditionally present the few-step generation results of our  
110 MeanFlow adaptation under *1-step*, *2-step*, *4-step*, and *8-step*  
111 settings, comparing them with the BLIP3o-NEXT baseline  
112 trained with standard Flow Matching under the same sam-  
113 pling step configurations.

114 As shown in Fig. 2, our method achieves an effective trade-  
115 off between inference speed and output quality: whereas the  
116 Flow Matching baseline exhibits noticeable blurring and loss  
117 of fine details when the number of sampling steps is reduced,  
118 our MeanFlow sampling retains salient object structures  
119 and fine-grained textures even at extremely low step counts,  
120 producing visually coherent and semantically faithful images  
121 at a fraction of the baseline’s inference time.

122 **Horizontal few-step comparison.** We also present side-  
123 by-side comparisons between our model and other few-step  
124 approaches at same 4-step settings (Fig. 3). These results  
125 highlight our model’s ability to preserve fine-grained details  
126 and adhere to textual instructions more faithfully than existing  
127 distilled models, across a diverse set of challenging prompts.

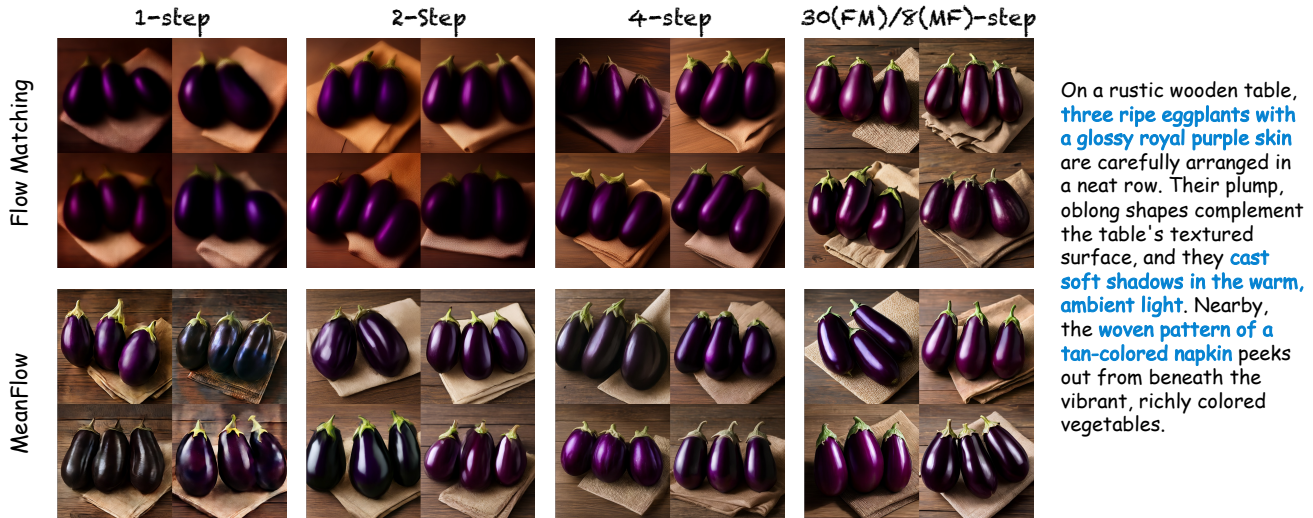

Figure 2. Representative visual results on DPG-Bench. Compared to the blurred outputs of few-step Flow Matching (FM) inference, our MeanFlow (MF) approach produces relatively sharp images even with a single sampling step, and with 8 sampling steps achieves visual quality comparable to Flow Matching using 30 steps, demonstrating a favorable trade-off between generation speed and visual fidelity.

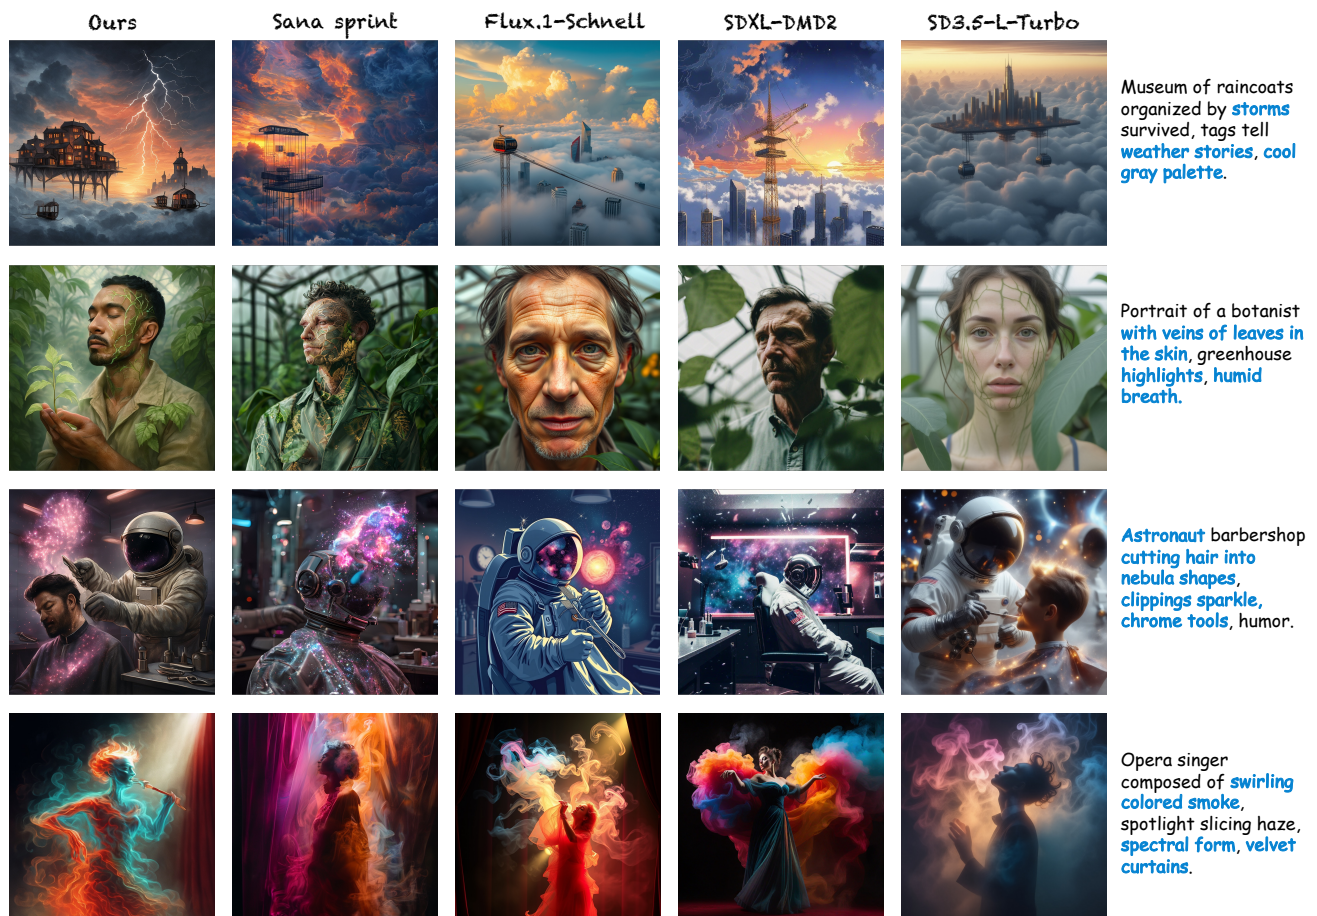

Figure 3. Additional comparisons under 4-step sampling between our method and existing distilled models. Our approach achieves higher semantic fidelity and richer visual details, closely adhering to complex text prompts. Blue text indicates cases where competing models fail to accurately render the described content.

128  
129  
130  
131  
132  
133  
134  
135  
136  
137  
138  
139  
140  
141  
142  
143  
144  
145  
146  
147  
148  
149  
150  
151  
152  
153  
154  
155  
156  
157  
158  
159  
160  
161  
162  
163  
164  
165  
166  
167  
168  
169  
170  
171  
172  
173  
174  
175  
176  
177  
178  
179  
180  
181  
182  
183  
184

## References

- [1] Junsong Chen, Jincheng Yu, Chongjian Ge, Lewei Yao, Enze Xie, Zhongdao Wang, James T Kwok, Ping Luo, Huchuan Lu, and Zhenguo Li. Pixart- $\alpha$ : Fast training of diffusion transformer for photorealistic text-to-image synthesis. In *ICLR*, 2024. 2
- [2] Le Zhuo, Ruoyi Du, Han Xiao, Yangguang Li, Dongyang Liu, Rongjie Huang, Wenze Liu, Xiangyang Zhu, Fu-Yun Wang, Zhanyu Ma, et al. Lumina-next: Making lumina-t2x stronger and faster with next-dit. *Advances in Neural Information Processing Systems*, 37:131278–131315, 2024. 2
- [3] Daiqing Li, Aleks Kamko, Ehsan Akhgari, Ali Sabet, Linmiao Xu, and Suhail Doshi. Playground v2. 5: Three insights towards enhancing aesthetic quality in text-to-image generation. *arXiv preprint arXiv:2402.17245*, 2024. 2
- [4] Zhimin Li, Jianwei Zhang, Qin Lin, Jiangfeng Xiong, Yanxin Long, Xincheng Deng, Yingfang Zhang, Xingchao Liu, Minbin Huang, Zedong Xiao, Dayou Chen, Jiajun He, Jiahao Li, Wenyue Li, Chen Zhang, Rongwei Quan, Jianxiang Lu, Jiabin Huang, Xiaoyan Yuan, Xiaoxiao Zheng, Yixuan Li, Jihong Zhang, Chao Zhang, Meng Chen, Jie Liu, Zheng Fang, Weiyang Wang, Jinbao Xue, Yangyu Tao, Jianchen Zhu, Kai Liu, Sihuan Lin, Yifu Sun, Yun Li, Dongdong Wang, Mingtao Chen, Zhichao Hu, Xiao Xiao, Yan Chen, Yuhong Liu, Wei Liu, Di Wang, Yong Yang, Jie Jiang, and Qinglin Lu. Hunyuan-dit: A powerful multi-resolution diffusion transformer with fine-grained chinese understanding, 2024. 2
- [5] Junsong Chen, Chongjian Ge, Enze Xie, Yue Wu, Lewei Yao, Xiaozhe Ren, Zhongdao Wang, Ping Luo, Huchuan Lu, and Zhenguo Li. Pixart- $\sigma$ : Weak-to-strong training of diffusion transformer for 4k text-to-image generation. In *European Conference on Computer Vision*, pages 74–91. Springer, 2024. 2
- [6] OpenAI. DALL-E 3. <https://openai.com/research/dall-e-3>, September 2023. 2
- [7] Black Forest Labs. Flux. <https://github.com/black-forest-labs/flux>, 2024. 2
- [8] Patrick Esser, Sumith Kulal, Andreas Blattmann, Rahim Entezari, Jonas Müller, Harry Saini, Yam Levi, Dominik Lorenz, Axel Sauer, Frederic Boesel, et al. Scaling rectified flow transformers for high-resolution image synthesis. In *Forty-first international conference on machine learning*, 2024. 2
- [9] Qi Cai, Jingwen Chen, Yang Chen, Yehao Li, Fuchen Long, Yingwei Pan, Zhaofan Qiu, Yiheng Zhang, Fengbin Gao, Peihan Xu, et al. Hidream-1l: A high-efficient image generative foundation model with sparse diffusion transformer. *arXiv preprint arXiv:2505.22705*, 2025. 2
- [10] Qi Qin, Le Zhuo, Yi Xin, Ruoyi Du, Zhen Li, Bin Fu, Yiting Lu, Jiakang Yuan, Xinyue Li, Dongyang Liu, et al. Lumina-image 2.0: A unified and efficient image generative framework. *arXiv preprint arXiv:2503.21758*, 2025. 2
- [11] Yu Gao, Lixue Gong, Qiushan Guo, Xiaoxia Hou, Zhichao Lai, Fanshi Li, Liang Li, Xiaochen Lian, Chao Liao, Liyang Liu, et al. Seedream 3.0 technical report. *arXiv preprint arXiv:2504.11346*, 2025. 2
- [12] OpenAI. Gpt-image-1, 2025. 2
- [13] Xichen Pan, Satya Narayan Shukla, Aashu Singh, Zhuokai Zhao, Shlok Kumar Mishra, Jialiang Wang, Zhiyang Xu, Jiuhai Chen, Kunpeng Li, Felix Juefei-Xu, et al. Transfer between modalities with metaqueries. *arXiv preprint arXiv:2504.06256*, 2025. 2
- [14] Jiuhai Chen, Zhiyang Xu, Xichen Pan, Yushi Hu, Can Qin, Tom Goldstein, Lifu Huang, Tianyi Zhou, Saining Xie, Silvio Savarese, et al. Blip3-o: A family of fully open unified multimodal models-architecture, training and dataset. *arXiv preprint arXiv:2505.09568*, 2025. 2
- [15] Size Wu, Zhonghua Wu, Zerui Gong, Qingyi Tao, Sheng Jin, Qinyue Li, Wei Li, and Chen Change Loy. Openuni: A simple baseline for unified multimodal understanding and generation. *arXiv preprint arXiv:2505.23661*, 2025. 2
- [16] Jiaming Han, Hao Chen, Yang Zhao, Hanyu Wang, Qi Zhao, Ziyang Yang, Hao He, Xiangyu Yue, and Lu Jiang. Vision as a dialect: Unifying visual understanding and generation via text-aligned representations. *arXiv preprint arXiv:2506.18898*, 2025. 2
- [17] Junzhe Xu, Yuyang Yin, and Xi Chen. Tbac-uniimage: Unified understanding and generation by ladder-side diffusion tuning. *arXiv preprint arXiv:2508.08098*, 2025. 2
- [18] Chenfei Wu, Jiahao Li, Jingren Zhou, Junyang Lin, Kaiyuan Gao, Kun Yan, Sheng-ming Yin, Shuai Bai, Xiao Xu, Yilei Chen, et al. Qwen-image technical report. *arXiv preprint arXiv:2508.02324*, 2025. 2
- [19] Tianwei Yin, Michaël Gharbi, Taesung Park, Richard Zhang, Eli Shechtman, Fredo Durand, and Bill Freeman. Improved distribution matching distillation for fast image synthesis. *Advances in neural information processing systems*, 37:47455–47487, 2024. 2
- [20] Axel Sauer, Frederic Boesel, Tim Dockhorn, Andreas Blattmann, Patrick Esser, and Robin Rombach. Fast high-resolution image synthesis with latent adversarial diffusion distillation. In *SIGGRAPH Asia 2024 Conference Papers*, pages 1–11, 2024. 2
- [21] Junsong Chen, Shuchen Xue, Yuyang Zhao, Jincheng Yu, Sayak Paul, Junyu Chen, Han Cai, Song Han, and Enze Xie. Sana-sprint: One-step diffusion with continuous-time consistency distillation. *arXiv preprint arXiv:2503.09641*, 2025. 2
